# Supplementary material
Source: PubMed Central journal article supplement (PMC4985043)
Supplement: NIHMS801367-supplement-Supp_Info_S6.pdf [file NIHMS801367-supplement-Supp_Info_S6.pdf]

|    | A             | B                             | C                                   | D                        | E                    | F                | G                                | H                                                         | I                               |
|----|---------------|-------------------------------|-------------------------------------|--------------------------|----------------------|------------------|----------------------------------|-----------------------------------------------------------|---------------------------------|
| 1  |               | <b>Protocol Program Sheet</b> | Program 6: ABC incubation after TSA |                          |                      |                  |                                  |                                                           |                                 |
| 2  |               | Creation Date:                |                                     |                          |                      |                  |                                  |                                                           |                                 |
| 3  |               | Protocol number of steps:     | 5                                   | Total 19 minutes in MW   |                      |                  |                                  |                                                           |                                 |
| 4  |               | Protocol Description:         | TSA ABC                             |                          |                      |                  |                                  |                                                           |                                 |
| 5  |               | Load cooler set point:        |                                     |                          |                      |                  |                                  |                                                           |                                 |
| 6  |               | Vacuum set point:             |                                     |                          |                      |                  |                                  |                                                           |                                 |
| 7  |               | Vacuum cycle Vacuum time:     |                                     |                          |                      |                  |                                  |                                                           |                                 |
| 8  |               | Vacuum cycle Vent time:       |                                     |                          |                      |                  |                                  |                                                           |                                 |
| 9  |               | Stirrer Speed:                |                                     |                          |                      |                  |                                  |                                                           |                                 |
| 10 | <b>Step #</b> | <b>Description</b>            | <b>User Prompt (on/off)</b>         | <b>Time (Hr:min:sec)</b> | <b>Power (Watts)</b> | <b>Temp (-C)</b> | <b>Load Cooler (off/auto/on)</b> | <b>Vacuum/Bubbler Pump (off/bub/vac cycle/vac on/vap)</b> | <b>SteadyTemp pump (on/off)</b> |
| 11 | 1             | ABC on                        | On                                  | 0: 5: 0                  | 150                  | 35               | Off                              | Off                                                       | Off                             |
| 12 | 2             | ABC off                       | Off                                 | 0: 2: 0                  | 0                    | 35               | Off                              | Off                                                       | Off                             |
| 13 | 3             | ABC on                        | On                                  | 0: 5: 0                  | 150                  | 35               | Off                              | Off                                                       | Off                             |
| 14 | 4             | ABC off                       | Off                                 | 0: 2: 0                  | 0                    | 35               | Off                              | Off                                                       | Off                             |
| 15 | 5             | ABC on                        | On                                  | 0: 5: 0                  | 150                  | 35               | Off                              | Off                                                       | Off                             |

|    | J                       |
|----|-------------------------|
| 1  |                         |
| 2  |                         |
| 3  |                         |
| 4  |                         |
| 5  |                         |
| 6  |                         |
| 7  |                         |
| 8  |                         |
| 9  |                         |
| 10 | SteadyTemp temp<br>(°C) |
| 11 | 30                      |
| 12 | 30                      |
| 13 | 30                      |
| 14 | 30                      |
| 15 | 30                      |
